# Supplementary material for: Synthesis of a sun-shaped amphiphilic copolymer consisting of a cyclic perfluorocyclobutyl aryl ether-based backbone and lateral PMAA side chains
Source: Royal Society of Chemistry journal article supplement (doi:10.1039/c4ra11630e), 2014-10-10
Supplement: c4ra11630e1.pdf [file c4ra11630e1.pdf]

# Supporting Information for

## “Synthesis of Amphiphilic Sun-shaped Copolymer Consisting of Cyclic Perfluorocyclobutyl Aryl Ether-based Backbone and Lateral PMAA Side Chains”

Wenqiang Yao, Yongjun Li, Chun Feng,\* Guolin Lu, Xiaoyu Huang\*

Key Laboratory of Synthetic and Self-Assembly Chemistry for Organic Functional  
Molecules, Shanghai Institute of Organic Chemistry, Chinese Academy of Sciences,  
345 Lingling Road, Shanghai 200032, P. R. China

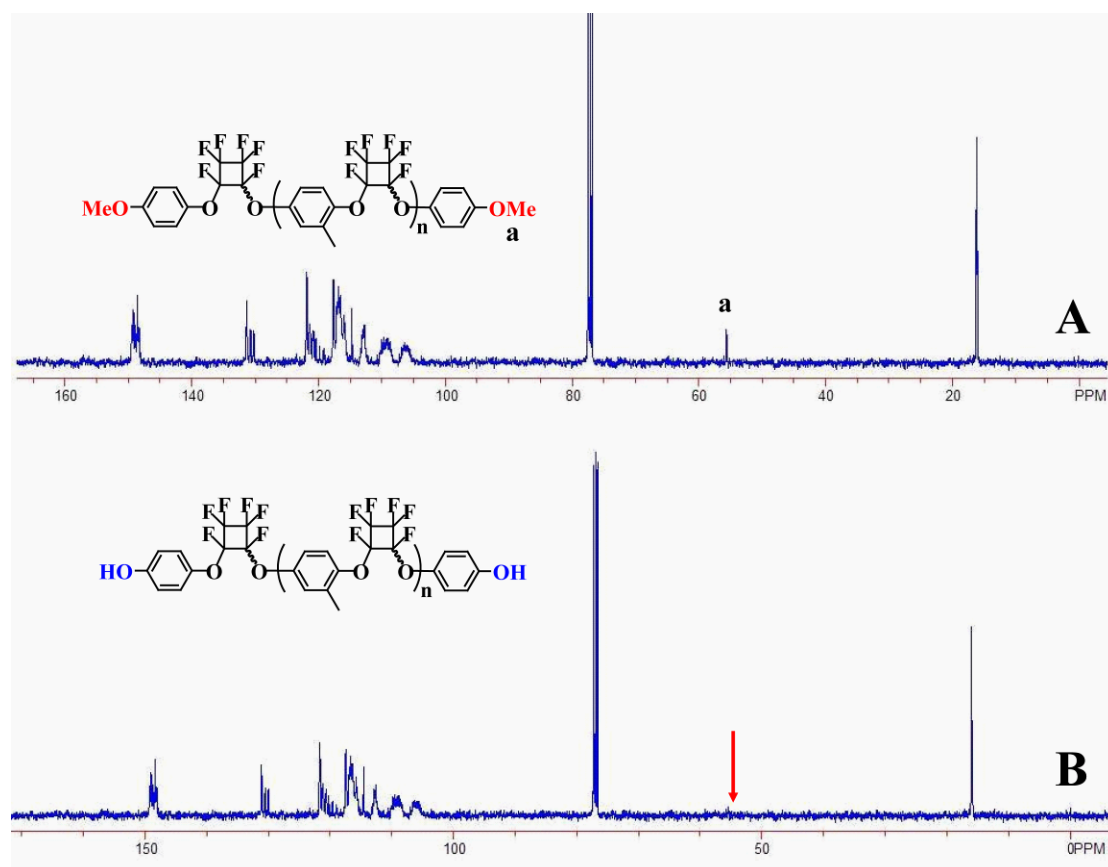

**Figure S1.**  $^{13}\text{C}$  NMR spectra of MeO-PMBTFVB-OMe **2** (A) and HO-PMBTFVB-OH **3** (B) in  $\text{CDCl}_3$ .

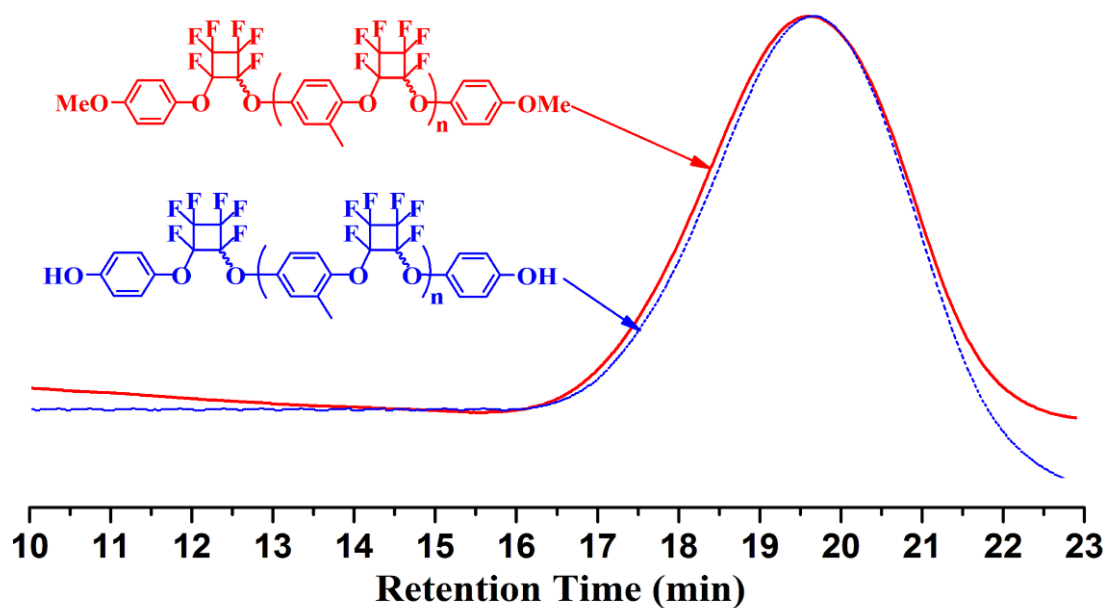

**Figure S2.** GPC traces of MeO-PMBTFVB-OMe **2** (red) and HO-PMBTFVB-OH **3** (blue) in THF.

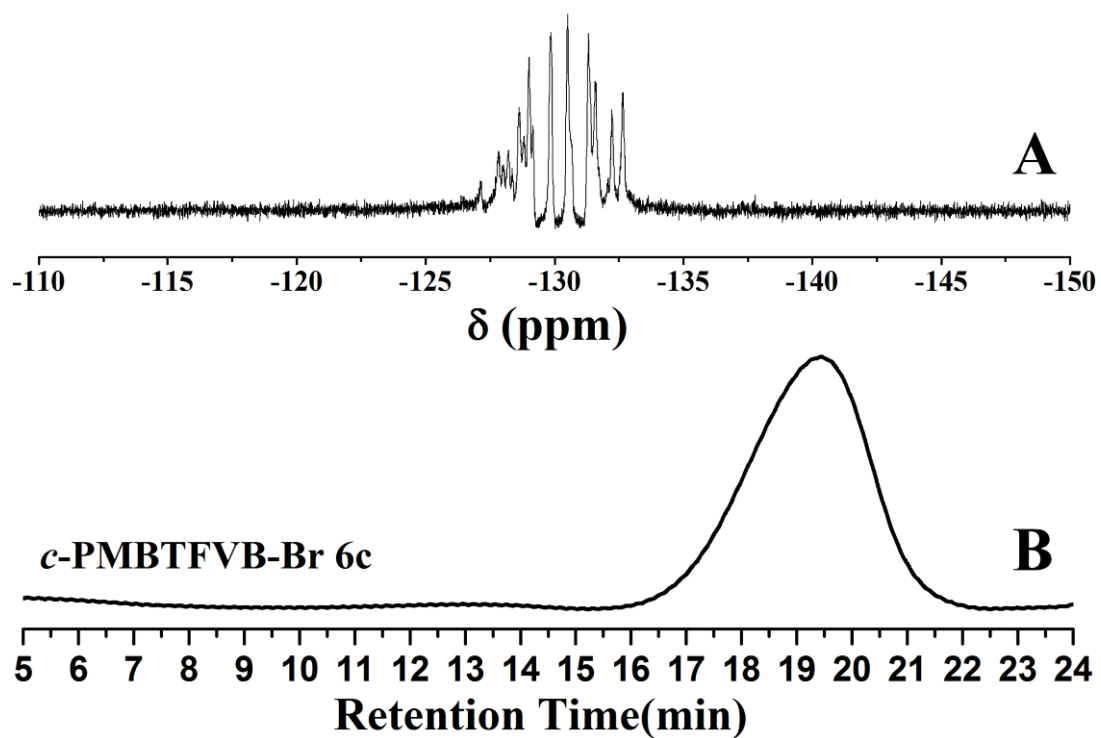

**Figure S3.**  $^{19}\text{F}$  NMR spectrum (A) and GPC curve (B) of *c*-PMBTFVB-Br **6c**.

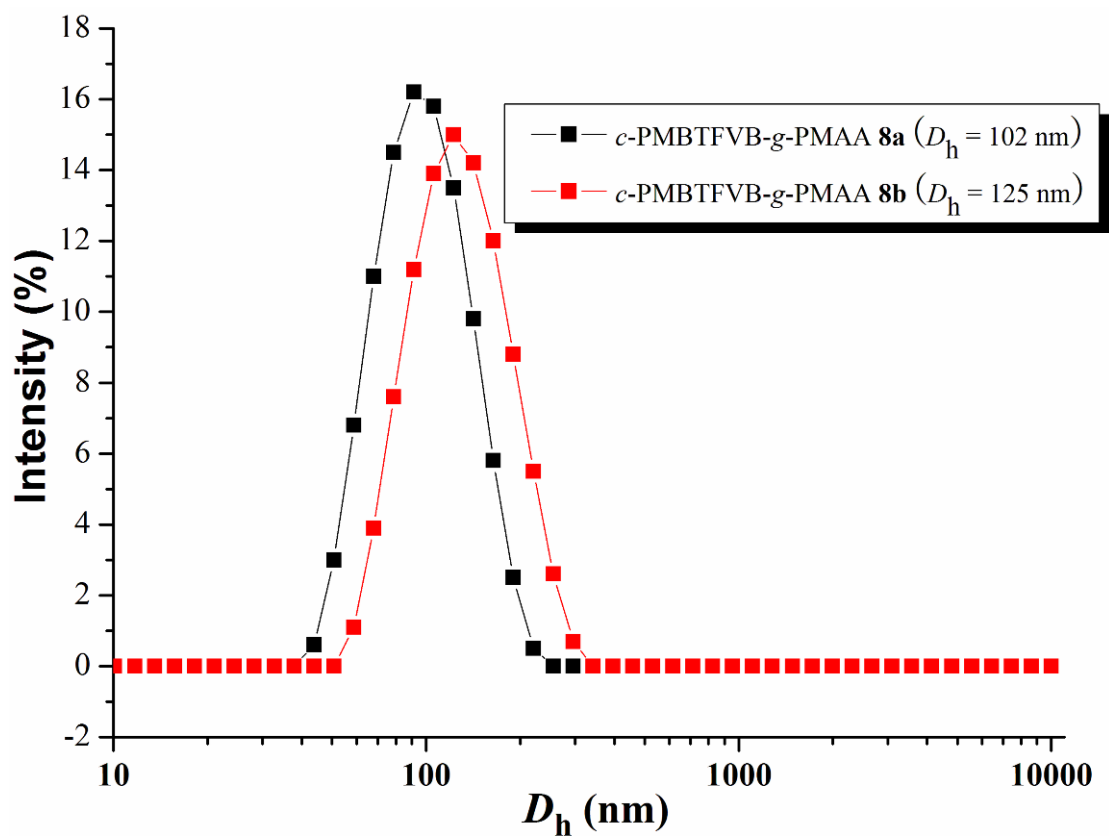

**Figure S4.** Hydrodynamic diameter distributions of micelles formed by  $c$ -PMBTFVB-*g*-PMAA **8a** and **8b**.
